# Supplementary material for: Freeboard Life-Cycle Benefit-Cost Analysis of a Rental Single-family Residence for Landlord, Tenant, and Insurer
Source: Copernicus journal article supplement (doi:10.5194/nhess-2022-222), 2022-09-12
Supplement: Supplementary file 1 [file nhess-2022-222-supplement.pdf]

## Supplementary Material

Supplementary Table 1. Components of Restoration Time as a Function of Flood Depth (Source: FEMA. 2013).

| Flood Depth (ft.) | Physical Restoration (Months) | Clean-up (Months) | Inspection Permits Approval (Months) | Contractor Availability (Months) | Total Restoration Time (Months) |
|-------------------|-------------------------------|-------------------|--------------------------------------|----------------------------------|---------------------------------|
| 0                 | 3                             | 1                 | 2                                    | 3                                | 9                               |
| 4                 | 6                             | 1                 | 2                                    | 3                                | 12                              |
| 8                 | 9                             | 1                 | 2                                    | 3                                | 15                              |
| 8+                | 18                            | 1                 | 2                                    | 3                                | 24                              |

Supplementary Table 2. Upper Limit of Mean Increase (%) in Cost of Freeboard at the Time of Construction, by FEMA Flood Zone.

| Freeboard (ft.) | A-Zone | Coastal A-Zone | V-Zone |
|-----------------|--------|----------------|--------|
| BFE + 1         | 2.3    | 3.9            | 1.8    |
| BFE + 2         | 4.5    | 4.8            | 3.6    |
| BFE + 3         | 6.8    | 6.1            | 5.4    |
| BFE + 4         | 9.1    | 8.1            | 7.2    |

Supplementary Table 3. Relationship between the actual cash value (ACV) and replacement cost (RC), example for a content with 10-year lifetime and considering linear depreciation.

| Year | Replacement Cost (RC) | Actual Cash Value (ACV) | ACV/RC |
|------|-----------------------|-------------------------|--------|
| 0    | 50,000                | 50,000                  | 100%   |
| 1    | 50,000                | 45,000                  | 90%    |
| 2    | 50,000                | 40,000                  | 80%    |
| 3    | 50,000                | 35,000                  | 70%    |
| 4    | 50,000                | 30,000                  | 60%    |
| 5    | 50,000                | 25,000                  | 50%    |
| 6    | 50,000                | 20,000                  | 40%    |
| 7    | 50,000                | 15,000                  | 30%    |
| 8    | 50,000                | 10,000                  | 20%    |
| 9    | 50,000                | 5,000                   | 10%    |
| 10   | 50,000                | 0                       | 0%     |
| Mean | 50,000                | 25,000                  | 50%    |
