# Supplementary material for: Freeboard Life-Cycle Benefit-Cost Analysis of a Rental Single-family Residence for Landlord, Tenant, and Insurer
Source: Copernicus journal article supplement (doi:10.5194/nhess-2022-222), 2022-09-12
Supplement: Supplementary file [file nhess-2022-222-CC1-supplement.pdf]

# Freeboard Life-Cycle Benefit-Cost Analysis of a Rental Single-family Residence for Landlord, Tenant, and Insurer

Ehab Gnan<sup>1†</sup>, Rubayet Bin Mostafiz<sup>2,3†\*</sup>, Md Adilur Rahim<sup>4†</sup>, Carol J. Friedland<sup>5</sup>, Robert V. Rohli<sup>2,3</sup>, Arash Taghinezhad<sup>1,5</sup>, Ayat Al Assi<sup>1</sup>

<sup>1</sup>Bert S. Turner Department of Construction Management, Louisiana State University, Baton Rouge, LA, United States

<sup>2</sup>Department of Oceanography & Coastal Sciences, College of the Coast & Environment, Louisiana State University, Baton Rouge, LA, United States

<sup>3</sup>Coastal Studies Institute, Louisiana State University, Baton Rouge, LA, United States

<sup>4</sup>Engineering Science Program, Louisiana State University, Baton Rouge, LA, United States

<sup>5</sup>LaHouse Resource Center, Department of Biological and Agricultural Engineering, Louisiana State University Agricultural Center, Baton Rouge, LA, United States

<sup>†</sup>These authors contributed equally to this work

\* **Correspondence to:** Rubayet Bin Mostafiz (rbinmo1@lsu.edu)

**Keywords:** life-cycle benefit-cost analysis (LCBCA), net benefit-cost ratio (NBCR), National Flood Insurance Program (NFIP), base flood elevation (BFE), annual exceedance probability (AEP), Gumbel extreme value distribution, average annual loss (AAL), discounted present value (DPV)

## Abstract

Flood risk to single-family rental housing remains poorly understood, leaving a large and increasing population underinformed to protect themselves, including regarding insurance. This research introduces a life-cycle benefit-cost analysis for the landlord, tenant, and insurer (i.e., National Flood Insurance Program (NFIP)) to optimize freeboard (i.e., additional first-floor height above the base flood elevation (BFE)) selection for a rental single-family home. Flood insurance premium; apportioned flood risk among the landlord, tenant, and NFIP by insurance coverage and deductible; rental loss; moving and displacement costs; freeboard construction cost; and rent increase upon freeboard implementation are considered in estimating net benefit (NB) by freeboard. For a 2,500 square-foot case study home in Metairie, Louisiana, a two-foot freeboard optimizes the combined savings for landlord and tenant, with joint life-cycle NB of \$23,658 and \$14,978, for a 3% and 7% real discount rate, respectively. Any freeboard up to 2.5 feet benefits the tenant and NFIP, while the landlord benefits for freeboards up to 4.0 feet. Collectively, results suggest that at the time of construction, even minimal freeboard provides substantial savings for the landlord, tenant, and NFIP. The research provides actionable information, supporting the decision-making process for landlords, tenants, and others, thereby enhancing investment and occupation decisions.

## 1. Introduction

Flood is considered as one of the most destructive natural hazards, which causes injuries and fatalities, social disruptions, infrastructural damages, and economic losses across the world (Das and Gupta, 2021; Rosser et al., 2017; Termeh et al., 2018). These losses are projected to increase worldwide as a combined result of climatic change, rapid urbanization, and improper land use managements (Caruso, 2017; Hino and Hall, 2017; Mangini et al., 2018; Zadeh et al., 2020). The impact of flooding on single-family rental homes is important to understand, because of the large and increasing share of rentals within the housing industry in the U.S.A. (Charles, 2020), with 14.9 million renter-occupied, single-family homes as of 2017 (Rosen, 2018), and many millions of homes in multi-family buildings. Moreover, many of the inhabitants of rental homes are among the most vulnerable to economic and social impacts from flood (Pelling, 1997, 1999; Masozera et al., 2007; Mee et al., 2014; Deria et al., 2020; Larson et al., 2021). Thus, understanding the true risk of flooding, the possible mitigation measures, and the economic implications of flooding in renter-occupied single-family homes is likely to influence investment choices and occupation decisions (Warren-Myers et al., 2018).

Yet, flood risk to single-family rental housing has been largely neglected by the scientific community. Federal Emergency Management Agency (FEMA) has acknowledged that the nation's flood policies neglect rental housing and focus only on owner-occupied housing (Hamideh et al., 2018). While the FEMA (2013) Hazus-MH tool and FEMA (2009) BCA Reference Guide provide useful benefit-cost analyses (BCA), they consider losses to landlords only instead of disaggregating losses among the affected parties – landlords, tenants, and the (U.S.) National Flood Insurance Program (NFIP; FEMA, 2019). The dearth of studies conducted on rental housing leaves a large segment of the population without adequate information to protect them, with landlords and tenants unaware of their flood risk (Hollar, 2017) even as they invest substantial sums (Warren-Myers et al., 2018). This necessitates development of a comprehensive flood risk assessment that quantifies flood losses for single-family rentals and provides actionable information (Mostafiz et al., 2022a) to landlords, tenants, and insurers.

In this research, life-cycle BCA (LCBCA) is conducted separately from the perspective of the landlord, tenant, and insurer (i.e., NFIP), over the home's 30-year mortgage period, for comprehensive evaluation of the most economically advantageous option at the time of construction regarding implementation of freeboard – elevation above the base flood elevation (BFE) – with multiple scenarios evaluated. The expected benefits and costs over the useful life of the home for each freeboard height are estimated and discounted to the present value (DPV). In these calculations, net benefit (NB) is the difference between the life-cycle benefits and costs for each freeboard scenario compared to “at BFE, no action” scenario. The optimal scenario is the freeboard with the largest joint life-cycle NB for landlord and tenant. The NB-to-cost ratio (NBCR) is defined as NB divided by the cost of the freeboard. The optimal freeboard scenario is the one that maximizes NBCR when NB is similar for multiple freeboard scenarios.

For the landlord, the NB and NBCR of implementing freeboard is evaluated through LCBCA considering freeboard cost, increase in rent, building flood insurance premiums, building average annual loss (AAL), and loss of rental income when the rental unit is withdrawn from the market. For the tenant, the benefit-cost of freeboard is evaluated through consideration of content AAL, content flood premiums, displacement cost, moving cost, and increase in rent. Additionally, the

79 LCBCA is calculated separately for the flood insurance policyholder and the NFIP, as the  
 80 policyholder is liable for the deductible and loss above coverage of flood loss while the NFIP  
 81 covers the remainder of the loss within coverage.

82 Here, LCBCA is conducted on a micro-scale (i.e., single-building-level) basis, which  
 83 allows for a greater level of detail than in bulk calculations (Bubeck et al., 2011; Lorente, 2019).  
 84 A one-story, single-family residence in Metairie, Louisiana, is used to demonstrate the method  
 85 presented. The study is motivated by the need to establish a methodology for estimating  
 86 freeboard LCBCA for the landlord, the tenant, and NFIP. The methodology delivers actionable  
 87 information and supports the decision-making process.

## 88 2. Methodology

89 The methodology consists of estimating the freeboard life-cycle benefit-cost for the landlord,  
 90 tenant, and insurer determined through LCBCA, performed for each 0.5-foot increment of  
 91 freeboard above the BFE up to 4.0 feet, evaluated over a 30-year period – the expected useful  
 92 life of a mitigation project (FEMA, 2009).

93 It is assumed here that as the flood risk will decrease with increasing freeboard, the landlord will  
 94 increase the rent of the home and the tenant will accept the rent increase. Table 1 summarizes the  
 95 benefits and costs from the perspectives of the landlord, tenant, and NFIP. For landlords, the  
 96 benefit of freeboard is the decrease in the building insurance premium, landlord portion of the  
 97 building’s AAL, and rental income loss, and increased in the rental income. The cost to the  
 98 landlord is the freeboard construction cost ( $C_{U_f}$ ). For tenants, the benefit of freeboard is the  
 99 decrease in the content insurance premium, portion of content AAL, displacement cost, and  
 100 moving cost. The tenant cost is the increase in rent. For the NFIP, the benefit of freeboard is the  
 101 decrease in the NFIP portion of the building and content AAL. The cost to the NFIP is the  
 102 decrease in building and content insurance premium.

103 Table 1. Costs and benefits to the landlord, tenant, and NFIP.

| Entity               | Benefits                                                                         | Costs                                    |
|----------------------|----------------------------------------------------------------------------------|------------------------------------------|
| Landlord             | Decrease in building premium, building AAL, and rental loss and increase in rent | Freeboard construction cost              |
| Tenant               | Decrease in content premium, content AAL, displacement, and moving cost          | Increase in rent                         |
| Insurer (i.e., NFIP) | Decrease in building and content AAL                                             | Decrease in building and content premium |

104 The methodology consists of the following steps: (i) determining the expected benefits and costs  
 105 at BFE vs. the benefits and costs of each freeboard scenario for the landlord, tenant, and NFIP,  
 106 considered separately; with all benefits and costs estimated on an annualized basis; (ii)  
 107 conducting LCBCA.

## 108 **2.1 Freeboard Benefits**

109 Benefits of freeboard are generally defined here as the future costs prevented or reduced and  
110 future income increased by implementing freeboard at the time of construction. These are  
111 determined by comparing the DPV of all costs and income over the useful life of the building  
112 with vs. without freeboard.

### 113 2.1.1 Landlord Freeboard Benefits

#### 114 Building Flood Insurance Premiums

115 For buildings with federally-backed loans located in a special flood hazard area (SFHA), the  
116 landlord is required to have flood insurance on the building only, but not the contents (Federal  
117 Deposit Insurance Corporation, 2016). The annual building insurance premium ( $P_b$ ) for each  
118 freeboard increment ( $I$ ) is calculated using the NFIP (2021) Flood Insurance Manual's post-  
119 FIRM (i.e., flood insurance rate map) rates for a single-family residence. For single-family  
120 homes, \$60,000 is the basic building coverage, with a limit of \$250,000 and a minimum  
121 deductible of \$1,250 is required for coverage above \$100,000 (NFIP, 2021).

#### 122 Building AAL

123 The building AAL ( $AAL_b$ ) is estimated using the method presented in Gnan (2021) and Gnan et  
124 al. (2022a). Flood depths derived from Monte Carlo simulations (e.g., Brodie, 2013; Hennequin  
125 et al., 2018; Kind, 2014; Kind et al., 2020; Qi et al., 2013; Rahim et al., 2021, 2022a; Rahman et  
126 al., 2002; Taghinezhad et al., 2020; Yu et al., 2013) with the fitted Gumbel extreme value  
127 distribution (e.g., Al Assi et al., 2022; Bhat et al., 2019; Gnan et al., 2022b; Kim & Lee, 2021;  
128 Manfreda et al., 2021; Mostafiz et al., 2021; 2022b; 2022c; Rahim et al., 2022b; Singh et al.,  
129 2018) are translated to building loss percentages using the U.S. Army Corps of Engineers  
130 (USACE (2000) depth-damage function (DDF) designed for the home's attributes (e.g., one-  
131 story or two-or-more stories, with or without basement). The loss percentages are then multiplied  
132 by the structure replacement cost (i.e., building value,  $BV$ ), and the average of the resulting  
133 losses of all Monte Carlo-simulated flooding events is the AAL.

134 While the USACE DDFs assign losses to the structure below the first-floor elevation (FFE) i.e.,  
135 at negative flood depths – below the building's first floor), it is assumed that when flood depths  
136 are below the FFE, the tenant will not relocate and there is no loss of rental income. However,  
137 losses are assumed to occur and are estimated for flood depths at –1 feet and greater.

138 The flood premium deductible for a building is represented within the flood loss, as the  
139 policyholder is liable for the specified deductible and loss above coverage while NFIP covers the  
140 remaining balance within coverage. Thus, the building AAL is apportioned as either landlord  
141 loss ( $AAL_{bL}$ ) or NFIP loss ( $AAL_{bNFIP}$ ) using the methodology presented in Gnan (2021) and  
142 Gnan et al. (2022a).

143 Loss of Rental Income

144 The magnitude of rental loss ( $R_l$ ) is a function of restoration time ( $S_t$ ), the latter of which is  
145 derived from the FEMA (2013) depth-time (in months) function (Supplementary Table 1). To  
146 estimate  $R_l$ , flood depths derived from Monte Carlo simulations are used to estimate  $S_t$  for each  
147 simulated event ( $S_{t_i}$ ), which is divided by 12 months per year. Next,  $BV$  is divided by the price  
148 to rent ratio ( $R_R$ , U.S. Census Bureau, 2019) to calculate the annual rent ( $AR$ ) of the home. The  
149  $AR$  is multiplied by the annual restoration time to derive the  $R_l$  for each simulation ( $R_{l_i}$ ). The  
150 average of the resulting  $R_{l_i}$  of all simulated flooding events is the annual  $R_l$ , such that

151 
$$R_l = \frac{1}{N} \sum_{i=1}^N \left( \frac{S_{t_i}}{12} \times \frac{BV}{R_R} \right) \quad (1)$$

152 where  $i$  is the Monte-Carlo-simulated event among  $N$  total events.

153 Increase in Rental Income

154 The increase in rental income to the landlord ( $RI$ ) is attributed to implementation of freeboard,  
155 which reduces the impact of flood loss and makes the rental more attractive to renters. For a risk-  
156 neutral decision, the rental rate of a home with flood risk should be lower than the reduced risk  
157 alternative. This is calculated by subtracting the  $AR$  of the home for the BFE and freeboard  
158 scenario  $I$  (Equation 2). The  $BV$  for each freeboard scenario ( $BV_I$ ) equals the  $BV$  at BFE  
159 ( $BV_{BFE}$ ) plus the freeboard construction cost ( $C_{U_I}$ ; Equation 3), which is described in Section  
160 2.2.1.

161 
$$RI_I = \frac{BV_I}{R_R} - \frac{BV_{BFE}}{R_R} \quad (2)$$

162 
$$BV_I = BV_{BFE} + C_{U_I} \quad (3)$$

163 Landlord Freeboard Benefit Calculation

164 The annual landlord benefit for each freeboard scenario ( $L_{B_I}$ ) is estimated as the difference  
165 between the sum of the building insurance premium ( $P_b$ ), building AAL for the landlord  
166 ( $AAL_{b_L}$ ), and loss of rental income ( $R_l$ ), for the BFE scenario and freeboard scenario  $I$ ; plus the  
167  $RI_I$  (Equation 4).

168 
$$L_{B_I} = [(P_{b_{BFE}} + AAL_{b_{L_{BFE}}} + R_{l_{BFE}}) - (P_{b_I} + AAL_{b_{L_I}} + R_{l_I})] + RI_I \quad (4)$$

169 2.1.2 Tenant Freeboard Benefits

170 For the tenant, the benefit of freeboard is evaluated through consideration of content flood  
171 insurance premiums, content AAL, and displacement and moving costs, for the BFE and  
172 freeboard scenarios. Although it is unlikely that the tenant will relocate when flood depths are  
173 below FFE, any greater depth is likely to cause the tenant to be displaced. Tenants bear  
174 displacement costs due to flood damage to the residence (Arcadis, 2019). However, the tenant  
175 likely will cease rent payment to the landlord and instead seek another rental (Arcadis, 2017).

176 Displacement and moving costs are considered in addition to the content loss and content  
177 insurance premium.

### 178 Content Flood Insurance Premiums

179 In this study, tenants are assumed to have a separate content-only flood policy, because standard  
180 renters' insurance generally does not cover flood loss (FEMA, 2020) and tenants are responsible  
181 for any flood loss to their personal belongings (Federal Deposit Insurance Corporation, 2016).  
182 Annual content insurance premiums ( $P_c$ ) are calculated using the NFIP (2021) Flood Insurance  
183 Manual's post-FIRM rates for a single-family residence. For single-family homes, \$25,000 is the  
184 basic content coverage, with a limit of \$100,000. A minimum deductible of \$1,000 is required for  
185 coverage of \$100,000 or less (NFIP, 2021). NFIP (2021) covers the actual cash value (ACV) of  
186 contents, which is the replacement cost minus the depreciation value at the time of loss. On  
187 average, ACV is half of the replacement cost over the contents' useful life, assuming here a linear  
188 depreciation and replacement of the contents after their useful life expires (Supplementary Table  
189 3).

### 190 Content AAL

191 Average annual content loss ( $AAL_c$ ) is estimated using the method presented in Gnan (2021) and  
192 Gnan et al. (2022a). To estimate  $AAL_c$ , depths derived from Monte Carlo simulations are  
193 translated to content loss percentages using the appropriate USACE (2000) DDF, with the  
194 estimate then partitioned between the tenant ( $AAL_{cT}$ ) and NFIP ( $AAL_{cNFIP}$ ) for each simulation  
195 (Gnan, 2021; Gnan et al., 2022a). The loss percentages are then multiplied by  $BV$ , and the  
196 average of all the simulated events is the  $AAL_c$ .

### 197 Displacement Cost

198 Tenants victimized by flood damage to their residence will be displaced temporarily and seek a  
199 shelter until finding another place to live. While some tenants may use public shelters or reside  
200 with families or friends, others will resort to lodging. This study considers only lodging in the  
201 loss assessment.

202 Berger (2017) assumed the displacement cost to be linearly proportional to the flooded  
203 residence's rental cost, where the displacement cost is estimated also as a one-time (one month)  
204 cost on the basis of square-footage of the damaged residence. The displacement cost in this study  
205 is estimated as a one-time cost equivalent to one month – the minimum time required to find  
206 another place (Chaplin, 2019) – based on lodging rate, which is more reflective of variable  
207 lodging costs than the cost based on the residence's square footage (FEMA, 2016). This study  
208 uses the U.S. General Service Administration (2021) current lodging per day rates for each state  
209 with a current national average of \$140 per day. This value for a given simulated event ( $D_{a_i}$ ) is  
210 converted to a monthly rate to estimate the one-time displacement cost for each simulated event.  
211 The average of the resulting displacement cost of all simulated flooding events is the expected  
212 annual displacement cost ( $D_c$ ; Equation 5), such that

$$213 \quad D_c = \frac{1}{N} \sum_{i=1}^N (D_{a_i} \times 30) \quad (5)$$

## 214 Moving Cost

215 Moving cost is associated with relocating the contents from the flooded residence. It is estimated  
216 based on the square footage of the flooded residence. A moving cost of \$1.20 per-square-foot  
217 (Arkin, 2021) is used in this study. The moving cost-per-square-foot ( $M_{cq_i}$ ) is multiplied by the  
218 building's total square footage ( $B_q$ ) to estimate the moving cost for each simulated event. The  
219 average of the resulting moving costs of all simulated flooding events is the annual moving cost  
220 ( $M_c$ ; Equation 6), or

$$221 \quad M_c = \frac{1}{N} \sum_{i=1}^N (M_{cq_i} \times B_q) \quad (6)$$

## 222 Tenant Freeboard Benefit Calculation

223 The annual tenant benefit for each freeboard scenario ( $T_{B_I}$ ; Equation 7) is the difference between  
224 the sum of the content annual insurance premium ( $P_c$ ), the tenant's share of the content AAL  
225 ( $AAL_{c_T}$ — 100 percent of the  $AAL_c$  if the tenant does not have insurance), annual expected  
226 displacement cost ( $D_c$ ), and annual expected moving cost ( $M_c$ ), for the BFE and freeboard  
227 scenarios.

$$228 \quad T_{B_I} = (P_{c_{BFE}} + AAL_{c_{TBFE}} + D_{c_{BFE}} + M_{c_{BFE}}) - (P_{c_I} + AAL_{c_{TI}} + D_{c_I} + M_{c_I}) \quad (7)$$

### 229 2.1.3 NFIP Freeboard Benefit

230 NFIP benefit for each freeboard scenario ( $NFIP_{B_I}$ ) is calculated as the difference in the NFIP  
231 portion of AAL for building ( $AAL_{b_{NFIP}}$ ) and content ( $AAL_{c_{NFIP}}$ ), for the BFE and freeboard  
232 scenarios (Gnan, 2021; Gnan et al., 2022a).

## 233 **2.2 Freeboard Costs**

### 234 2.2.1 Landlord Freeboard Costs

235 The landlord cost for freeboard is estimated as a percentage of  $BV$  and is based on FEMA (2008)  
236 guidance for new, single-family residences. While FEMA (2008) reports the cost for each  
237 freeboard increment ( $I$ ) as a range of percentage estimates of total building cost, this work  
238 applies the upper limit as a conservative measure (Supplementary Table 2). Landlord annual  
239 freeboard cost ( $L_{C_I}$ ) and total upfront freeboard cost ( $C_{U_I}$ ) are calculated using the methodology  
240 presented in Gnan (2021) and Gnan et al. (2022a).

### 241 2.2.2 Tenant Freeboard Costs

242 Tenant freeboard cost ( $T_C$ ) is calculated based on the difference between the tenant rent for  
243 freeboard scenario ( $T_{R_I}$ ) and the BFE scenario ( $T_{R_{BFE}}$ ; Equation 8). The landlord rental income  
244 and tenant rent will increase with the increasing freeboard.

$$245 \quad T_{C_I} = T_{R_I} - T_{R_{BFE}} \quad (8)$$

### 246 2.2.3 NFIP Freeboard Costs

247 NFIP freeboard cost ( $NFIP_C$ ) is calculated based on the difference between the insurance  
248 premiums (building ( $P_b$ ) and content ( $P_c$ )) at BFE and in freeboard scenario  $I$  (Equation 9). The  
249 NFIP insurance premium will decrease with increasing freeboard.

$$250 \quad NFIP_{C_I} = (P_{b_{BFE}} + P_{c_{BFE}}) - (P_{b_I} + P_{c_I}) \quad (9)$$

## 251 2.3 Life-cycle Benefit-Cost Analysis (LCBCA)

252 To determine whether incorporating freeboard results in life-cycle benefit, all annualized benefits  
253 and costs are discounted to the present value (DPV), thus enabling the comparison of mitigation  
254 costs with the expected future benefits (Tate et al., 2016) by transforming the expected future  
255 costs and benefits to present-value terms (Frank, 2000). LCBCA is performed through  
256 consideration of NB and NBCR. The scenario with largest positive life-cycle NB is the optimal  
257 option. In contrast, NBCR expresses the life-cycle cost effectiveness of the mitigation scenario  
258 by showing the ratio between NB and cost.

### 259 2.3.1 Discounted Present Value (DPV)

260 The DPV of generalized benefits ( $B_{DPV}$ ; Equation 10) or costs ( $C_{DPV}$ ; Equation 11) is the  
261 discounted annualized benefits ( $B_t$ ) or costs ( $C_t$ ) using a discount rate ( $R_D$ ) over a time horizon in  
262 years ( $t$ ), or

$$263 \quad B_{DPV} = \sum_{t=1}^T \frac{B_t}{(1+R_D)^t} \quad (10)$$

$$264 \quad C_{DPV} = \sum_{t=1}^T \frac{C_t}{(1+R_D)^t} \quad (11)$$

265 A sensitivity analysis is conducted to contrast results that assume a 7% real discount rate with  
266 those generated assuming a 3% real discount rate. This approach is consistent with the  
267 requirements of the U.S. Office of Management and Budget (1992) for BCA analyses.

### 268 2.3.2 Net Benefit (NB)

269 The NB to the landlord ( $L_{NB}$ ), tenant ( $T_{NB}$ ), and NFIP ( $NFIP_{NB}$ ) of including freeboard is the  
270 difference between the benefit to the landlord ( $L_B$ ), tenant ( $T_B$ ), and NFIP ( $NFIP_B$ ) and cost to the  
271 landlord ( $L_C$ ), tenant ( $T_C$ ), and NFIP ( $NFIP_C$ ), for each freeboard scenario  $I$  (Equation 12-14).

$$272 \quad L_{NB_I} = L_{B_I} - L_{C_I} \quad (12)$$

$$273 \quad T_{NB_I} = T_{B_I} - T_{C_I} \quad (13)$$

$$274 \quad NFIP_{NB_I} = NFIP_{B_I} - NFIP_{C_I} \quad (14)$$



275 2.3.3 Net Benefit to Cost Ratio (NBCR)

276 The life-cycle cost effectiveness of the freeboard (i.e., benefit per dollar spent) is expressed by  
 277 NBCR to the landlord ( $L_{NBCR}$ ), tenant ( $T_{NBCR}$ ), and NFIP ( $NFIP_{NBCR}$ ), which is the total NB of a  
 278 freeboard scenario divided by its total cost (Equation 15-17).

279 
$$L_{NBCR_I} = \frac{L_{NB_I}}{L_{C_I}} \tag{15}$$

280 
$$T_{NBCR_I} = \frac{T_{NB_I}}{T_{C_I}} \tag{16}$$

281 
$$NFIP_{NBCR_I} = \frac{NFIP_{NB_I}}{NFIP_{C_I}} \tag{17}$$

282 **3. Case Study**

283 A one-story, single-family residence with 2,500 ft<sup>2</sup> of living area within the AE flood zone,  
 284 located in Metairie, Louisiana, at coordinates 29°5'39"N, 90°1'05"W, is used to demonstrate the  
 285 presented methodology. The ground elevation of the site is -7.0 feet (NAVD88), with -4 feet  
 286 BFE (NAVD88). Using the area’s average construction cost of \$92.47 per square foot (Moselle,  
 287 2019), the total estimated construction cost is \$231,175. The site’s flood elevations are  
 288 determined from FEMA’s Risk Mapping, Assessment and Planning (Risk MAP) project (FEMA,  
 289 2022), and the corresponding flood depths above ground are shown in Table 2.

290 Table 2. Case Study Site Flood Elevations and Corresponding Depth Above Ground.

| Annual Probability of Exceedance | Flood Elevation (NAVD88) | Flood Depth (feet) |
|----------------------------------|--------------------------|--------------------|
| 0.002                            | -3.4                     | 3.6                |
| 0.01                             | -3.9                     | 3.1                |
| 0.02                             | -4.2                     | 2.8                |
| 0.1                              | -4.7                     | 2.3                |

291 **4. Results and Discussion**

292 Results are presented in two steps: (i) annual benefits and costs for landlord, tenant, and NFIP  
 293 are calculated, with all annual estimates discounted to the PV for the life cycle of the building;  
 294 (ii) the LCBCA is conducted, where NBs and NBCRs are obtained for multiple freeboard  
 295 scenarios and real discount rates, with NB and NBCR also apportioned between landlord, tenant,  
 296 and NFIP. LCBCA of freeboard insurance savings is performed separately.

297 **4.1 Expected Freeboard Benefits**

298 The difference in life-cycle benefits and costs with vs. without adding freeboard is the freeboard  
 299 benefit. LCBCA is conducted for the landlord, tenant, and NFIP.

300 4.1.1 Landlord Freeboard Benefits

301 The landlord total annual benefit ranges from 0 (at BFE+0 ft. of freeboard) to \$2,310 (at  
 302 BFE+4.0 ft. of freeboard); benefit increases with increasing freeboard (Table 3). The landlord  
 303 total annual benefits shown in Table 3 must be compared against the costs to identify the NB.  
 304 The cost for each freeboard increment is estimated based on a total construction cost of \$231,175  
 305 paid over a 30-year mortgage with fixed rate of 3.375%, and 7% payment-related fees. The  
 306 corresponding annual flood insurance building premiums are calculated based on maximum BV  
 307 of \$231,175, with the minimum deductible of \$1,250 and Community Rating System (NFIP,  
 308 2020) discount of 25% (rating of 5). The building AAL is apportioned as landlord and NFIP  
 309 AAL.

310 Table 3. Landlord’s Expected Total Annual Benefits by Freeboard Height.

| Freeboard (feet) | Building Annual Insurance Premium Decrease | Building AAL Decrease | Annual Rental Loss Decrease | Annual Rent Increase | Total Annual Benefit |
|------------------|--------------------------------------------|-----------------------|-----------------------------|----------------------|----------------------|
| 0.0              | \$0                                        | \$0                   | \$0                         | \$0                  | \$0                  |
| 0.5              | \$0                                        | \$35                  | \$56                        | \$120                | \$211                |
| 1.0              | \$773                                      | \$48                  | \$74                        | \$241                | \$1,136              |
| 1.5              | \$773                                      | \$55                  | \$85                        | \$356                | \$1,269              |
| 2.0              | \$1,078                                    | \$58                  | \$88                        | \$471                | \$1,695              |
| 2.5              | \$1,078                                    | \$60                  | \$90                        | \$591                | \$1,819              |
| 3.0              | \$1,185                                    | \$60                  | \$90                        | \$712                | \$2,047              |
| 3.5              | \$1,185                                    | \$61                  | \$91                        | \$832                | \$2,169              |
| 4.0              | \$1,205                                    | \$61                  | \$91                        | \$953                | \$2,310              |

311  
 312 As shown in Table 4, annual losses (i.e., landlord building AAL and rental loss) are reduced with  
 313 each additional freeboard increment. The landlord annual building insurance premium decreases  
 314 with one foot of freeboard (Table 4). Annual rent increases with freeboard increment (Table 4) as  
 315 freeboard reduces flood risk and carries extra cost. Greater avoided losses occur with smaller  
 316 freeboard because the largest proportion of losses occurs at lesser flood depths. Loss of rental  
 317 income is based on the time required to restore the building and increases with the severity of the  
 318 expected damage. However, it is limited to flood depths above the FFE.

319 Table 4. Landlord’s Expected Annual Costs and Income by Freeboard Height.

| Freeboard (feet) | Freeboard Cost (Loan/Annual) | Building Annual Insurance Premium | Building AAL | Landlord Building AAL | Annual Rental Loss | Annual Rent |
|------------------|------------------------------|-----------------------------------|--------------|-----------------------|--------------------|-------------|
| 0.0              | \$0                          | \$1,788                           | \$1,090      | \$61                  | \$91               | \$10,475    |
| 0.5              | \$158                        | \$1,788                           | \$443        | \$26                  | \$35               | \$10,595    |
| 1.0              | \$316                        | \$1,015                           | \$226        | \$13                  | \$17               | \$10,716    |
| 1.5              | \$467                        | \$1,015                           | \$95         | \$6                   | \$6                | \$10,831    |
| 2.0              | \$619                        | \$710                             | \$44         | \$3                   | \$3                | \$10,946    |
| 2.5              | \$777                        | \$710                             | \$21         | \$1                   | \$1                | \$11,066    |

|     |         |       |      |     |     |          |
|-----|---------|-------|------|-----|-----|----------|
| 3.0 | \$935   | \$603 | \$13 | \$1 | \$1 | \$11,187 |
| 3.5 | \$1,093 | \$603 | \$4  | \$0 | \$0 | \$11,307 |
| 4.0 | \$1,251 | \$583 | \$2  | \$0 | \$0 | \$11,428 |

320  
321 In addition to the previously discussed benefits including increase in rental income, the landlord  
322 will experience other benefits from avoiding or reducing flood losses. Increased flood risk to the  
323 rental house can result in a loss of demand, increased vacancy, and decreased property value due  
324 to the expected risk cost liabilities associated with owning or occupying such a property  
325 (Warren-Myers et al., 2018).

#### 326 4.1.2 Tenant Freeboard Benefits

327 For the tenant, the annual content premiums are calculated based on a maximum content value of  
328 \$100,000, with the minimum deductible of \$1,250 and CRS discount of 25%. The content AAL  
329 is apportioned between the tenant and the NFIP. Displacement cost is estimated as a one-time,  
330 one-month cost, assuming a conservative one-room estimate with a two-member household. The  
331 tenant total benefit ranges from 0 (at BFE+0 ft. of freeboard) to \$621 (at BFE+4.0 ft. of  
332 freeboard); benefit increases with increasing freeboard (Table 5). The tenant benefit is always  
333 lower than the landlord’s benefit, except for the 0.5 ft. freeboard scenario (Table 3 and 5). On an  
334 average, the tenant benefit is 35% of the landlord benefit.

335 Table 5. Tenant Total Annual Benefits for Each Freeboard Scenario.

| Freeboard (feet) | Content Annual Insurance Premium Decrease | Tenant Content AAL Decrease | Annual Displacement Cost Decrease | Annual Moving Cost Decrease | Total Annual Benefits |
|------------------|-------------------------------------------|-----------------------------|-----------------------------------|-----------------------------|-----------------------|
| 0.0              | \$0                                       | \$0                         | \$0                               | \$0                         | \$0                   |
| 0.5              | \$0                                       | \$236                       | \$28                              | \$20                        | \$284                 |
| 1.0              | \$107                                     | \$317                       | \$37                              | \$27                        | \$488                 |
| 1.5              | \$107                                     | \$365                       | \$43                              | \$31                        | \$546                 |
| 2.0              | \$142                                     | \$384                       | \$44                              | \$32                        | \$602                 |
| 2.5              | \$142                                     | \$393                       | \$45                              | \$33                        | \$613                 |
| 3.0              | \$142                                     | \$397                       | \$45                              | \$33                        | \$617                 |
| 3.5              | \$142                                     | \$399                       | \$46                              | \$33                        | \$620                 |
| 4.0              | \$142                                     | \$400                       | \$46                              | \$33                        | \$621                 |

336 Tenants also experience indirect benefits from the added level of safety and loss reduction,  
337 avoiding temporary relocation. Avoiding a forced displacement on short notice relieves possible  
338 insecurity and stress, both emotionally and physically (Hollar, 2017). Moreover, stability in  
339 housing avoids possible displacement of individual and families from their communities in cases  
340 in which relocation within their immediate area is impossible (Hollar, 2017).

341 Tenant annual losses (i.e., content AAL, displacement and moving cost) are reduced with each  
342 additional freeboard increment (Table 6) and are relatively smaller than those for the landlord  
343 (Table 4 and 6). Content AAL is almost eliminated at the second foot of freeboard and  
344 displacement cost and moving cost are almost eliminated with the first foot of freeboard (Table  
345 6). The content annual insurance premium decreases only with 1.0 and 2.0 ft. of freeboard and it

346 remains constant after 2.0 ft. of freeboard (Table 6). Tenant’s annual rent increases with increase  
 347 of freeboard (Table 6) as it reduces the flood risk and carries additional cost.

348 Table 6. Tenant Annual Costs for Each Freeboard Height Scenario.

| Freeboard (feet) | Content Annual Insurance Premium | Content AAL | Tenant Content AAL | Annual Displacement Cost | Annual Moving Cost | Annual Rent |
|------------------|----------------------------------|-------------|--------------------|--------------------------|--------------------|-------------|
| 0.0              | \$356                            | \$680       | \$401              | \$46                     | \$33               | \$10,475    |
| 0.5              | \$356                            | \$278       | \$165              | \$18                     | \$13               | \$10,595    |
| 1.0              | \$249                            | \$142       | \$84               | \$9                      | \$6                | \$10,716    |
| 1.5              | \$249                            | \$60        | \$36               | \$3                      | \$2                | \$10,831    |
| 2.0              | \$214                            | \$28        | \$17               | \$2                      | \$1                | \$10,946    |
| 2.5              | \$214                            | \$13        | \$8                | \$1                      | \$0                | \$11,066    |
| 3.0              | \$214                            | \$7         | \$4                | \$1                      | \$0                | \$11,187    |
| 3.5              | \$214                            | \$3         | \$2                | \$0                      | \$0                | \$11,307    |
| 4.0              | \$214                            | \$1         | \$1                | \$0                      | \$0                | \$11,428    |

349 4.1.3 NFIP Freeboard Benefits

350 NFIP’s expected annual benefits (i.e., aggregated NFIP’s building and content annual benefits  
 351 from flood loss reduction) is increases with freeboard increment (Table 7). Although results  
 352 show that incorporating freeboard yields substantial benefits to landlord, tenant, and NFIP, it is  
 353 evident that the losses are primarily borne by the NFIP.

354 Table 7. NFIP Total Annual Benefits for Each Freeboard Scenario.

| Freeboard (feet) | NFIP Building AAL | NFIP Content AAL | NFIP Building AAL Decrease | NFIP Content AAL Decrease | Total Annual Benefits |
|------------------|-------------------|------------------|----------------------------|---------------------------|-----------------------|
| 0.0              | \$1,029           | \$279            | \$0                        | \$0                       | \$0                   |
| 0.5              | \$417             | \$113            | \$612                      | \$166                     | \$778                 |
| 1.0              | \$213             | \$58             | \$816                      | \$221                     | \$1,037               |
| 1.5              | \$89              | \$24             | \$940                      | \$255                     | \$1,195               |
| 2.0              | \$41              | \$11             | \$988                      | \$268                     | \$1,256               |
| 2.5              | \$20              | \$5              | \$1,009                    | \$274                     | \$1,283               |
| 3.0              | \$12              | \$3              | \$1,017                    | \$276                     | \$1,293               |
| 3.5              | \$4               | \$1              | \$1,025                    | \$278                     | \$1,303               |
| 4.0              | \$2               | \$1              | \$1,027                    | \$278                     | \$1,305               |

355

356 **4.2 Expected Freeboard Cost for Landlord, Tenant, and NFIP**

357 While landlord and tenant annual freeboard costs increase with each increment of freeboard, the  
 358 NFIP annual freeboard cost increases only with each additional one-foot increment above BFE  
 359 (Table 8). This is because there are no premium savings for half-foot increments (NFIP, 2021).

360 Table 8. Expected Annual Freeboard Cost for Landlord, Tenant, and NFIP.

| Freeboard (ft.) | Landlord Freeboard Cost | Tenant Annual Rent | Tenant Freeboard Cost | Total NFIP Annual Premium | NFIP Freeboard Cost |
|-----------------|-------------------------|--------------------|-----------------------|---------------------------|---------------------|
| 0.0             | \$0                     | \$10,475           | \$0                   | \$2,144                   | \$0                 |
| 0.5             | \$158                   | \$10,595           | \$120                 | \$2,144                   | \$0                 |
| 1.0             | \$316                   | \$10,716           | \$241                 | \$1,264                   | \$880               |
| 1.5             | \$467                   | \$10,831           | \$356                 | \$1,264                   | \$880               |
| 2.0             | \$619                   | \$10,946           | \$471                 | \$924                     | \$1,220             |
| 2.5             | \$777                   | \$11,066           | \$591                 | \$924                     | \$1,220             |
| 3.0             | \$935                   | \$11,187           | \$712                 | \$817                     | \$1,327             |
| 3.5             | \$1,093                 | \$11,307           | \$832                 | \$817                     | \$1,327             |
| 4.0             | \$1,251                 | \$11,428           | \$953                 | \$797                     | \$1,347             |

361 **4.3 Life-cycle Benefit-Cost Analysis (LCBCA)**

362 Once all annual benefit and cost estimates are discounted to the PV for the life of the building,  
 363 the cumulative DPVs of benefits and cost are calculated for the “at BFE no action” scenario and  
 364 for each freeboard scenario. The LCBCA calculations are carried out using a baseline 7% real  
 365 discount rate, with 3% real discount rate also calculated, to test the sensitivity of results. LCBCA  
 366 results are presented as NB and NBCR for each freeboard scenario using both real discount rates  
 367 (Table 9).

368 The landlord life-cycle NBs of freeboard ranging between \$658 (0.5 ft. of freeboard) and  
 369 \$13,799 (3.0 ft. of freeboard), with total NBCRs ranging from 0.3 (0.5 ft. of freeboard) to 2.6  
 370 (1.0 ft. of freeboard), when assuming the baseline real discount rate of 7%, and between \$1,039  
 371 (0.5 ft. of freeboard) and \$21,796 (3.0 ft. of freeboard), when assuming a 3% real discount rate  
 372 (Table 9). The NB for landlord, tenant, and NFIP are greatest at 3.0, 1.0, and 0.5 feet of  
 373 freeboard, respectively (Table 9). Beyond 2.5 feet of freeboard, the tenant experiences negative  
 374 NB as few or no further reductions are realized in content annual premium, content AAL,  
 375 displacement, and moving costs. Therefore, annual rent increase outweighs the reductions in this  
 376 case study, resulting in a negative NB. Likewise, there are no further reductions in NFIP’s  
 377 building and content losses beyond 2.5 feet of freeboard, and estimates depend only on NFIP  
 378 cost, resulting in a negative NB.

379 Table 9. LCBCA Results for Each Freeboard Scenario by Stakeholder and Real Discount Rate,  
 380 with Optimal Freeboard Shown in Boldface.

| Freeboard (ft.) | First-Floor Elevation (ft.) |      | Landlord |          | Tenant         |                | (Landlord + Tenant) |                 | NFIP            |                |
|-----------------|-----------------------------|------|----------|----------|----------------|----------------|---------------------|-----------------|-----------------|----------------|
|                 |                             |      | 3%       | 7%       | 3%             | 7%             | 3%                  | 7%              | 3%              | 7%             |
| 0.5             | -3.5                        | NB   | \$1,039  | \$658    | \$3,214        | \$2,035        | \$4,253             | \$2,693         | <b>\$15,249</b> | <b>\$9,654</b> |
|                 |                             | NBCR | 0.3      | 0.3      | 1.4            | 1.4            | 0.8                 | 0.8             | -               | -              |
| 1.0             | -3.0                        | NB   | \$16,072 | \$10,175 | <b>\$4,841</b> | <b>\$3,065</b> | \$20,914            | \$13,240        | \$3,077         | \$1,948        |
|                 |                             | NBCR | 2.6      | 2.6      | 1.0            | 1.0            | 0.7                 | 0.7             | 0.2             | 0.2            |
| 1.5             | -2.5                        | NB   | \$15,720 | \$9,952  | \$3,724        | \$2,358        | \$19,444            | \$12,310        | \$6,174         | \$3,909        |
|                 |                             | NBCR | 1.7      | 1.7      | 0.5            | 0.5            | 0.6                 | 0.6             | 0.4             | 0.4            |
| 2.0             | -2.0                        | NB   | \$21,090 | \$13,352 | \$2,568        | \$1,626        | <b>\$23,658</b>     | <b>\$14,978</b> | \$706           | \$447          |

|     |      |      |                 |                 |           |           |          |          |         |         |
|-----|------|------|-----------------|-----------------|-----------|-----------|----------|----------|---------|---------|
|     |      | NBCR | 1.7             | 1.7             | 0.3       | 0.3       | 0.5      | 0.5      | 0.0     | 0.0     |
| 2.5 | -1.5 | NB   | \$20,424        | \$12,930        | \$431     | \$273     | \$20,855 | \$13,203 | \$1,235 | \$782   |
|     |      | NBCR | 1.3             | 1.3             | 0.0       | 0.0       | 0.4      | 0.4      | 0.1     | 0.1     |
| 3.0 | -1.0 | NB   | <b>\$21,796</b> | <b>\$13,799</b> | (\$1,862) | (\$1,179) | \$19,934 | \$12,620 | (\$666) | (\$422) |
|     |      | NBCR | 1.2             | 1.2             | -0.1      | -0.1      | 0.3      | 0.3      | 0.0     | 0.0     |
| 3.5 | -0.5 | NB   | \$21,090        | \$13,352        | (\$4,155) | (\$2,631) | \$16,935 | \$10,721 | (\$470) | (\$298) |
|     |      | NBCR | 1.0             | 1.0             | -0.3      | -0.3      | 0.3      | 0.3      | 0.0     | 0.0     |
| 4.0 | 0.0  | NB   | \$20,757        | \$13,141        | (\$6,507) | (\$4,120) | \$14,250 | \$9,021  | (\$823) | (\$521) |
|     |      | NBCR | 0.8             | 0.8             | -0.3      | -0.3      | 0.2      | 0.2      | 0.0     | 0.0     |

381 All freeboard scenarios outperform the “at BFE no action scenario.” The landlord and tenant  
382 combined/joint life-cycle NBs of freeboard ranges between \$2,693 (for 0.5 feet) and \$14,978 (for  
383 2.0 feet), with total NBCRs ranging from 0.2 (at 4.0 feet) to 0.8 (at 0.5 feet), when assuming the  
384 baseline real discount rate of 7%, and between \$4,253 (for 0.5 feet) and \$23,658 (for 2.0 feet),  
385 when assuming a 3% real discount rate. The peak NB for landlord and tenant combined/joint at  
386 2.0 feet of freeboard indicates that the economically optimal freeboard is 2.0 feet. The NB is  
387 \$14,978 when applying a 7% real discount rate, and \$23,658 when assuming a real discount rate  
388 of 3%. However, at that increment, total life-cycle NBCR is 0.5 at either real discount rate, so  
389 this freeboard scenario is less preferred than the 0.5- and 1.0-foot scenarios when considering the  
390 NBCR metric (Table 9). The largest NBCR is observed in the smallest freeboard scenario and  
391 then shows an incremental decrease, indicating that benefit per dollar of cost declines as FFE  
392 increases, likely because the largest share of flood losses occurs for lower FFEs.

393 Even if the other benefits are neglected, the savings in annual flood insurance premiums alone  
394 are sufficient to offset the freeboard construction cost. Except for the first half-foot increment for  
395 which no premiums savings are realized, the life-cycle NB from flood premium savings ranges  
396 between \$10,920 and \$16,715, with NBCRs ranging from 1.1 to 2.8 when assuming a 7% real  
397 discount rate, and from \$17,248 to \$26,402 when using a 3% real discount rate (Table 10).

| Freeboard (feet) |      | 3%       | 7%       |
|------------------|------|----------|----------|
| 0.5              | NB   | \$0      | \$0      |
|                  | NBCR | 0        | 0        |
| 1.0              | NB   | \$17,248 | \$10,920 |
|                  | NBCR | 2.8      | 2.8      |
| 1.5              | NB   | \$17,248 | \$10,920 |
|                  | NBCR | 1.9      | 1.9      |
| 2.0              | NB   | \$23,913 | \$15,139 |
|                  | NBCR | 2.0      | 2.0      |
| 2.5              | NB   | \$23,913 | \$15,139 |
|                  | NBCR | 1.6      | 1.6      |
| 3.0              | NB   | \$26,010 | \$16,467 |
|                  | NBCR | 1.4      | 1.4      |
| 3.5              | NB   | \$26,010 | \$16,467 |
|                  | NBCR | 1.2      | 1.2      |

|     |      |          |           |
|-----|------|----------|-----------|
| 4.0 | NB   | \$26,402 | \$16,7398 |
|     | NBCR | 1.1      | 1.1399    |

Table 10. Flood Insurance Premium LCBCA Results for Each Freeboard Scenario by Real Discount Rate.

401  
402  
403  
404  
405  
406  
407  
408  
409  
410  
411

## 5. Summary and Conclusion

413 This research offers a comprehensive, customized flood risk assessment to landlords and tenants,  
414 by quantifying flood losses and actionable information, to enhance their awareness of their flood  
415 risk and the possible benefits from mitigation measures. Being aware of the full flood risk,  
416 mitigation options, and economic implications enhances investment and occupation decisions.  
417 To that end, an LCBCA methodology is demonstrated to determine the life-cycle benefits of  
418 adding freeboard for landlord, tenant, and NFIP in single-family rental housing. Major results for  
419 a case study home in Metairie, Louisiana, include:

- 420 • The landlord and tenant combined/joint life-cycle NB is \$14,978 with NBCR of 0.5 for  
421 baseline real discount rate of 7%, and \$23,658 for a 3% real discount rate.
- 422 • Elevation to the optimal height of 2.0 feet reduces annual building premiums by 60% and  
423 annual content premiums by 40%.
- 424 • In addition to savings on insurance premiums, landlords and tenants would also enjoy  
425 benefits by reducing direct physical loss and the other costs due to loss of function.
- 426 • Elevating a home to the optimal height significantly reduces annual building and rental losses  
427 for the landlord, and annual content, displacement, and moving losses for the tenant.

428 Several assumptions have been made in this analysis. It is assumed that as soon as the building is  
429 restored, it will be rented immediately. Further, although this study is comprehensive in its  
430 assessment of the economic impacts of including freeboard in avoiding direct losses (building  
431 and contents) and indirect losses (rent, displacement cost, and move cost) for the different  
432 constituents, the environmental, social, and psychological impacts of enhanced home security,  
433 increased future asset values, and buffering against the potential negative effects of climate  
434 change are not considered here. Thus, the estimates likely underrepresent the true benefits of  
435 adding freeboard.

436 These flood loss assessments rely on uncertain variables such as the unpredictable nature of  
437 flood and the generality of flood loss and restoration time functions. Furthermore, these types of  
438 analyses are strongly constrained by flood data quality and availability. LCBCA requires future  
439 projections of real discount rates that are also uncertain.

440 While acknowledging the limitations, the methodology proposed in this study provides a novel  
441 framework for quantifying life-cycle benefit of freeboard for single-family rentals through  
442 LCBCA. To the best knowledge of the authors, there are no studies available applying a life-  
443 cycle cost-benefit analysis for the landlord, tenant, and insurer. The results highlight the need to  
444 evaluate the life-cycle benefits of freeboard at a single-building level, to allow for a more  
445 localized and detailed assessment. Extending this method to multi-family rentals and upscaling  
446 to estimate community-level will further assist in enhancing resilience to the flood hazard.

## 447 **6. Conflict of Interest**

448 *The authors declare that the research was conducted in the absence of any commercial or*  
449 *financial relationships that could be construed as a potential conflict of interest.*

## 450 **7. Author Contributions**

451 RBM selected the study area, prepared the base flood data, organized the paper, edited and  
452 improved the manuscript. EG developed the methodology, interpreted the findings, and drafted  
453 the manuscript. MAR code the method, verified the results, and edited the manuscript. CF  
454 conceptualized the research idea, helped refine the methodology, and reviewed and edited the  
455 manuscript. RR reviewed and edited earlier versions of the manuscript. AT provided advice and  
456 contributed to the literature review. AAS edited the text.

## 457 **8. Funding**

458 This research was funded by the U.S. Department of Homeland Security (Award Number: 2015-  
459 ST-061-ND0001-01), the Louisiana Sea Grant College Program (Omnibus cycle 2020–2022;  
460 Award Number: NA18OAR4170098; Project Number: R/CH-03), the Gulf Research Program of  
461 the National Academies of Sciences, Engineering, and Medicine under the Grant Agreement  
462 number: 200010880, “The New First Line of Defense: Building Community Resilience through  
463 Residential Risk Disclosure,” and the U.S. Department of Housing and Urban Development  
464 (HUD; 2019–2022; Award No. H21679CA, Subaward No. S01227-1). Any opinions, findings,  
465 conclusions, and recommendations expressed in this manuscript are those of the authors and do



466 not necessarily reflect the official policy or position of the funders. The publication of this article  
467 is subsidized by the LSU Libraries Open Access Author Fund.

468 **9. Data Availability Statement**

469 The raw data supporting the conclusions of this article will be made available by the authors,  
470 without undue reservation, to any qualified researcher by requesting to the corresponding author.

471 **References**

- 472 Al Assi, A., Mostafiz, R. B., Friedland, C. J., Rahim, M. A., & Rohli, R. V. (2022). Assessing  
473 community-level flood risk at the micro-scale by owner/occupant type and first-floor  
474 height. In review at *Frontiers in Big Data*.  
475 <https://www.essoar.org/doi/abs/10.1002/essoar.10511940.1>
- 476 Arcadis. (2017). *Resilient Bridgeport, Benefit Cost Analysis Methodology Report*. Retrieved  
477 from Connecticut Department of Housing [https://portal.ct.gov/-](https://portal.ct.gov/-/media/DOH/Sandy_Relief_Docs/AP-BCA.pdf?la=en)  
478 [/media/DOH/Sandy\\_Relief\\_Docs/AP-BCA.pdf?la=en](https://portal.ct.gov/-/media/DOH/Sandy_Relief_Docs/AP-BCA.pdf?la=en)
- 479 Arcadis. (2019). *East Side Coastal Resiliency: Benefit Cost Analysis*. Retrieved from New York  
480 City Department of Design and Construction  
481 [https://www1.nyc.gov/assets/cdbgdr/documents/amendments/ESCR\\_BCA\\_082019.pdf](https://www1.nyc.gov/assets/cdbgdr/documents/amendments/ESCR_BCA_082019.pdf)
- 482 Arkin, G. (2021). *Top Long Distance Moving Companies for 2021*. Retrieved from Nexuus  
483 <https://nexusautotransport.com/top-long-distance-moving-companies-for-2021/>
- 484 Berger, L. (2017). *Rebuild by Design Living Breakwaters Project: Benefit Cost Analysis*.  
485 Retrieved from New York Governor’s Office of Storm Recovery  
486 [https://stormrecovery.ny.gov/sites/default/files/crp/community/documents/Appendix%20](https://stormrecovery.ny.gov/sites/default/files/crp/community/documents/Appendix%20D%20-%20Breakwaters%20Project%20Benefit%20Cost%20Analysis.pdf)  
487 [D%20-%20Breakwaters%20Project%20Benefit%20Cost%20Analysis.pdf](https://stormrecovery.ny.gov/sites/default/files/crp/community/documents/Appendix%20D%20-%20Breakwaters%20Project%20Benefit%20Cost%20Analysis.pdf)
- 488 Bhat, M.S., Alam, A., Ahmad, B., Kotlia, B.S., Farooq, H., Taloor, A.K., & Ahmad, S. (2019).  
489 Flood frequency analysis of river Jhelum in Kashmir basin. *Quaternary*  
490 *International*, 507, 288-294. <https://doi.org/10.1016/j.quaint.2018.09.039>
- 491 Brodie, I. M. (2013). Rational Monte Carlo method for flood frequency analysis in urban  
492 catchments. *Journal of Hydrology*, 486, 306-314.  
493 <https://doi.org/10.1016/j.jhydrol.2013.01.039>
- 494 Bubeck, P., De Moel, H., Bouwer, L. M., & Aerts, J. C. J. H. (2011). How reliable are  
495 projections of future flood damage? *Natural Hazards and Earth System Sciences*  
496 *(NHES)*, 11(12), 3293–3306. <https://doi.org/10.5194/nhess-11-3293-2011>
- 497 Chaplin, J. (2019). *How Long Does it Take to Find an Apartment?* Retrieved Apartment List  
498 <https://www.apartmentlist.com/renter-life/how-long-to-find-an-apartment>
- 499 Charles, S. L. (2020). The financialization of single-family rental housing: An examination of  
500 real estate investment trusts’ ownership of single-family houses in the Atlanta  
501 metropolitan area. *Journal of Urban Affairs*, 42(8), 1321–1341.  
502 <https://doi.org/10.1080/07352166.2019.1662728>
- 503 Deria, A., Ghannad, P., & Lee, Y. C. (2020). Evaluating implications of flood vulnerability  
504 factors with respect to income levels for building long-term disaster resilience of low-  
505 income communities. *International Journal of Disaster Risk Reduction*, 48, 101608.  
506 <https://doi.org/10.1016/j.ijdrr.2020.101608>
- 507 Federal Deposit Insurance Corporation (FDIC). (2016). *Flood Insurance*. Retrieved from Federal  
508 Deposit Insurance Corporation  
509 <https://www.fdic.gov/regulations/resources/director/technical/flood/flood-4.pdf>
- 510 FEMA. (2008). *2008 Supplement to the 2006 Evaluation of the National Flood Insurance*  
511 *Program’s Building Standards*. Retrieved from  
512 <https://www.wbdg.org/ffc/dhs/criteria/fema-2008-supp-2006-eval-nfip-stand>
- 513 FEMA. (2009). *BCA Reference Guide*. Retrieved from  
514 [https://www.fema.gov/sites/default/files/2020-04/fema\\_bca\\_reference-guide.pdf](https://www.fema.gov/sites/default/files/2020-04/fema_bca_reference-guide.pdf)

515 FEMA. (2013). *Multi-hazard Loss Estimation Methodology: Flood Model Hazus-MH Technical*  
516 *Manual*. Retrieved from Department of Homeland Security, Federal Emergency  
517 Management Agency Mitigation Division. [https://www.fema.gov/sites/default/files/2020-](https://www.fema.gov/sites/default/files/2020-09/fema_hazus_flood-model_technical-manual_2.1.pdf)  
518 [09/fema\\_hazus\\_flood-model\\_technical-manual\\_2.1.pdf](https://www.fema.gov/sites/default/files/2020-09/fema_hazus_flood-model_technical-manual_2.1.pdf)

519 FEMA. (2016). *Benefit-Cost Sustainment and Enhancements*. Retrieved from  
520 [http://nhma.info/wp-content/uploads/2017/01/BCA\\_Toolkit\\_v5\\_ReleaseNotes.pdf](http://nhma.info/wp-content/uploads/2017/01/BCA_Toolkit_v5_ReleaseNotes.pdf)

521 FEMA. (2019). *Basic Concepts in Benefit-Cost Analysis (BCA) Unit 3— Instructor Guide*.  
522 Retrieved from Federal Emergency Management Agency  
523 [https://www.fema.gov/sites/default/files/2020-04/fema\\_bca\\_instructor-guide\\_unit-3.pdf](https://www.fema.gov/sites/default/files/2020-04/fema_bca_instructor-guide_unit-3.pdf)

524 FEMA (2022). Risk Mapping, Assessment and Planning (Risk MAP).  
525 <https://www.fema.gov/flood-maps/tools-resources/risk-map>

526 Frank, R. H. (2000). Why is cost-benefit analysis so controversial? *The Journal of Legal Studies*,  
527 29(S2), 913–930. <https://doi.org/10.1086/468099>

528 Gnan, E. (2021). Single-Family Residential Flood Loss Reduction through Freeboard. PhD  
529 Dissertation. Louisiana State university.  
530 [https://digitalcommons.lsu.edu/gradschool\\_dissertations/5599/](https://digitalcommons.lsu.edu/gradschool_dissertations/5599/)

531 Gnan, E., Friedland, C. J., Mostafiz, R. B., Rahim, M. A., Gentimis, T., Taghinezhad, A., &  
532 Rohli, R. V. (2022a). Economically optimizing elevation of new, single-family  
533 residences for flood mitigation via life-cycle benefit-cost analysis. *Frontiers in*  
534 *Environmental Science*. Art. No. 889239. [https://doi.org/Doi:](https://doi.org/Doi:10.3389/fenvs.2022.889239)  
535 [10.3389/fenvs.2022.889239](https://doi.org/Doi:10.3389/fenvs.2022.889239).

536 Gnan, E., Friedland, C. J., Rahim, M. A., Mostafiz, R. B., Rohli, R. V., Orooji, F., Taghinezhad,  
537 A., & McElwee, J. (2022b). Improved building-specific flood risk assessment and  
538 implications for depth-damage function selection. *Frontiers in Water*, 10, Art. No.  
539 919726. <https://doi.org/10.3389/frwa.2022.919726>

540 Hamideh, S., Peacock, W. G., & van Zandt, S. (2018). Housing recovery after disasters: Primary  
541 versus seasonal/vacation housing markets in coastal communities. *Natural Hazards*  
542 *Review*. [https://doi.org/10.1061/\(ASCE\)NH.1527-6996.0000287](https://doi.org/10.1061/(ASCE)NH.1527-6996.0000287)

543 Hennequin, T., Sørup, H. J. D., Dong, Y., & Arnbjerg-Nielsen, K. (2018). A framework for  
544 performing comparative LCA between repairing flooded houses and construction of dikes  
545 in non-stationary climate with changing risk of flooding. *Science of The Total*  
546 *Environment*, 642, 473–484 (2018). <https://doi.org/10.1016/j.scitotenv.2018.05.404>

547 Hollar, M. K. (2017). Reducing the flood hazard exposure of HUD-assisted properties.  
548 *Cityscape*, 19(2), 281–300. <https://www.jstor.org/stable/26328341>

549 Kim, S. U. & Lee, C. E. (2021). Incorporation of cost-benefit analysis considering epistemic  
550 uncertainty for calculating the optimal design flood. *Water Resources Management*,  
551 35(2), 757–774. <https://doi.org/10.1007/s11269-021-02764-z>

552 Kind, J. M. (2014). Economically efficient flood protection standards for the Netherlands.  
553 *Journal of Flood Risk Management*, 7(2), 103–117. <https://doi.org/10.1111/jfr3.12026>

554 Kind, J., Botzen, W. W. & Aerts, J. C. (2020). Social vulnerability in cost-benefit analysis for  
555 flood risk management. *Environment and Development Economics*, 25(2), 115–134.  
556 <https://doi.org/10.1017/S1355770X19000275>

557 Larson, P. S., Gronlund, C., Thompson, L., Sampson, N., Washington, R., Steis Thorsby, J.,  
558 Lyon, N., & Miller, C. (2021). Recurrent Home Flooding in Detroit, MI 2012–2020:  
559 Results of a Household Survey. *International journal of environmental research and*  
560 *public health*, 18(14), 7659. <https://doi.org/10.3390/ijerph18147659>

- 561 Lorente, P. (2019). A spatial analytical approach for evaluating flood risk and property damages:  
 562 Methodological improvements to modelling. *Journal of Flood Risk Management*, 12(4),  
 563 Art. No. e12483. <https://doi.org/10.1111/jfr3.12483>
- 564 Manfreda, S., Miglino, D. & Albertini, C. (2021). Impact of detention dams on the probability  
 565 distribution of floods. *Hydrology and Earth System Sciences*, 25(7), 4231–4242.  
 566 <https://doi.org/10.5194/hess-25-4231-2021>
- 567 Masozera, M., Bailey, M., & Kerchner, C. (2007). Distribution of impacts of natural disasters  
 568 across income groups: A case study of New Orleans. *Ecological Economics*, 63(2-3),  
 569 299-306. <https://doi.org/10.1016/j.ecolecon.2006.06.013>
- 570 Mee, K. J., Instone, L., Williams, M., Palmer, J., & Vaughan, N. (2014). Renting over troubled  
 571 waters: An urban political ecology of rental housing. *Geographical Research*, 52(4), 365-  
 572 376. <https://doi.org/10.1111/1745-5871.12058>
- 573 Moselle, B. (2019). *2019 National Building Cost Manual*. Craftsman Book Company. Retrieved  
 574 from [https://www.craftsman-](https://www.craftsman-book.com/media/static/previews/2019_NBC_book_preview.pdf)  
 575 [book.com/media/static/previews/2019\\_NBC\\_book\\_preview.pdf](https://www.craftsman-book.com/media/static/previews/2019_NBC_book_preview.pdf)  
 576
- 577 Mostafiz, R.B., Friedland, C., Rahim, M.A., Rohli, R.V., & Bushra, N. (2021). A data-driven,  
 578 probabilistic, multiple return period method of flood depth estimation. In *American*  
 579 *Geophysical Union Fall Meeting 2021*.  
 580 <https://www.essoar.org/doi/10.1002/essoar.10509337.1>
- 581 Mostafiz, R.B., Rohli, R.V., Friedland, C.J., & Lee, Y-C. (2022a). Actionable Information in  
 582 Flood risk communications and the potential for new web-based tools for long-term  
 583 planning for individuals and community. *Frontiers in Earth Science*, 10, Art. No.  
 584 840250. doi: 10.3389/feart.2022.840250
- 585 Mostafiz, R.B., Assi, A.A., Friedland, C., Rohli, R.V., & Rahim, M.A. (2022b). A Numerically-  
 586 integrated approach for residential flood loss estimation at the community level. In *EGU*  
 587 *General Assembly 2022*. Vienna, Austria, 23–27 May. [https://doi.org/10.5194/egusphere-](https://doi.org/10.5194/egusphere-egu22-10827)  
 588 [egu22-10827](https://doi.org/10.5194/egusphere-egu22-10827)
- 589 Mostafiz, R.B. (2022c). Estimation of Economic Risk from Coastal Natural Hazards in Louisiana.  
 590 LSU Doctoral Dissertations. 5880.  
 591 [https://digitalcommons.lsu.edu/gradschool\\_dissertations/5880](https://digitalcommons.lsu.edu/gradschool_dissertations/5880)
- 592 NFIP. (2020). *NFIP Flood Insurance Manual. Appendix F: Community Rating System*. Retrieved  
 593 from Washington, DC: [https://www.fema.gov/sites/default/files/2020-05/fim\\_appendix-f-](https://www.fema.gov/sites/default/files/2020-05/fim_appendix-f-community-rating-system_apr2020.pdf)  
 594 [community-rating-system\\_apr2020.pdf](https://www.fema.gov/sites/default/files/2020-05/fim_appendix-f-community-rating-system_apr2020.pdf)
- 595 NFIP. (2021). *NFIP Flood Insurance Manual. Appendix J: Rate Tables*. Washington, DC.  
 596 Retrieved from [https://www.fema.gov/sites/default/files/documents/fema\\_nfip-all-flood-](https://www.fema.gov/sites/default/files/documents/fema_nfip-all-flood-insurance-manual-apr-2021.pdf)  
 597 [insurance-manual-apr-2021.pdf](https://www.fema.gov/sites/default/files/documents/fema_nfip-all-flood-insurance-manual-apr-2021.pdf)
- 598 Pelling, M. (1997). What determines vulnerability to floods; a case study in Georgetown,  
 599 Guyana. *Environment and Urbanization*, 9(1), 203-226.  
 600 <https://doi.org/10.1177/095624789700900116>
- 601 Pelling, M. (1999). The political ecology of flood hazard in urban Guyana. *Geoforum*, 30(3),  
 602 249-261. [https://doi.org/10.1016/S0016-7185\(99\)00015-9](https://doi.org/10.1016/S0016-7185(99)00015-9)
- 603 Qi, H., Qi, P. & Altinakar, M. S. (2013). GIS-based spatial Monte Carlo analysis for integrated  
 604 flood management with two dimensional flood simulation. *Water Resources*  
 605 *Management*, 27(10), 3631–3645. <https://doi.org/10.1007/s11269-013-0370-8>

- 606 Rahim, M.A., Friedland, C.J., Rohli, R.V., Bushra, N., & Mostafiz, R.B. (2021). A data-intensive  
607 approach to allocating owner vs. NFIP portion of average annual flood losses. In *AGU*  
608 *2021 Fall Meeting*. New Orleans, LA, 13–17 December.  
609 <https://www.essoar.org/doi/abs/10.1002/essoar.10509884.1>
- 610 Rahim, M.A., Friedland, C.J., Mostafiz, R.B., Rohli, R.V., & Bushra, N. (2022a). Apportionment  
611 of average annual flood loss between homeowner and insurer.  
612 <https://doi.org/10.21203/rs.3.rs-1483728/v1>
- 613 Rahim, M.A., Gnan, E.S., Friedland, C.J., Mostafiz, R.B., & Rohli, R.V. (2022b). An Improved  
614 Micro Scale Average Annual Flood Loss Implementation Approach. In *EGU General*  
615 *Assembly 2022*. Vienna, Austria, 23–27 May. [https://doi.org/10.5194/egusphere-egu22-](https://doi.org/10.5194/egusphere-egu22-10940)  
616 [10940](https://doi.org/10.5194/egusphere-egu22-10940)
- 617 Rahman, A., Weinmann, P.E., Hoang, T.M.T., & Laurenson, E.M. (2002). Monte Carlo  
618 simulation of flood frequency curves from rainfall. *Journal of Hydrology*, 256(3–4), 196-  
619 210. [https://doi.org/10.1016/S0022-1694\(01\)00533-9](https://doi.org/10.1016/S0022-1694(01)00533-9)
- 620 Rosen, K. T. (2018). *The Case for Preserving Costa-Hawkins: The Potential Impacts of Rent*  
621 *Control on Single Family Homes*. Retrieved from  
622 <https://escholarship.org/content/qt8wt9p088/qt8wt9p088.pdf>
- 623 Singh, P., Sinha, V. S. P., Vijhani, A., & Pahuja, N. (2018). Vulnerability assessment of urban  
624 road network from urban flood. *International Journal of Disaster Risk Reduction*, 28,  
625 237–250. <https://doi.org/10.1016/j.ijdrr.2018.03.017>
- 626 Taghinezhad, A., Friedland, C. J. & Rohli, R. V. (2020). Benefit-cost analysis of flood-mitigated  
627 residential buildings in Louisiana. *Housing and Society*, 48(2), 185–202.  
628 <https://doi.org/10.1080/08882746.2020.1796120>.
- 629 Tate, E., Strong, A., Kraus, T., & Xiong, H. (2016). Flood recovery and property acquisition in  
630 Cedar Rapids, Iowa. *Natural Hazards*, 80(3), 2055–2079. [https://doi.org/10.1007/s11069-](https://doi.org/10.1007/s11069-015-2060-8)  
631 [015-2060-8](https://doi.org/10.1007/s11069-015-2060-8)
- 632 U.S. Census Bureau (2019). Census Bureau’s 2019 1-year American Community Survey.  
633 [https://data.census.gov/cedsci/table?q=United%20States%20rent%20cost%20ratio&g=16](https://data.census.gov/cedsci/table?q=United%20States%20rent%20cost%20ratio&g=1600000US2250115&y=2019&d=ACS%201-Year%20Supplemental%20Estimates&tid=ACSSE2019.K202511)  
634 [00000US2250115&y=2019&d=ACS%201-](https://data.census.gov/cedsci/table?q=United%20States%20rent%20cost%20ratio&g=1600000US2250115&y=2019&d=ACS%201-Year%20Supplemental%20Estimates&tid=ACSSE2019.K202511)  
635 [Year%20Supplemental%20Estimates&tid=ACSSE2019.K202511](https://data.census.gov/cedsci/table?q=United%20States%20rent%20cost%20ratio&g=1600000US2250115&y=2019&d=ACS%201-Year%20Supplemental%20Estimates&tid=ACSSE2019.K202511)
- 636 U.S. General Service Administration (2021). *Per Diem Rates*. Retrieved from  
637 <https://www.gsa.gov/travel/plan-book/per-diem-rates>
- 638 U.S. Office of Management and Budget. (1992). *Guidelines and Discount Rates for Benefit-Cost*  
639 *Analysis of Federal Programs*. Circular No. A-94. Retrieved from  
640 [https://www.whitehouse.gov/wp-](https://www.whitehouse.gov/wp-content/uploads/legacy_drupal_files/omb/circulars/A94/a094.pdf)  
641 [content/uploads/legacy\\_drupal\\_files/omb/circulars/A94/a094.pdf](https://www.whitehouse.gov/wp-content/uploads/legacy_drupal_files/omb/circulars/A94/a094.pdf)
- 642 USACE. (2000). Economic Guidance Memorandum (EGM) 01-03, Generic Depth Damage  
643 Relationships. Washington, DC: US Army Corps of Engineers. Retrieved from  
644 <https://planning.erdc.dren.mil/toolbox/library/EGMs/egm01-03.pdf>
- 645 Wang, Y., & Sebastian, A. (2021). Community flood vulnerability and risk assessment: An  
646 empirical predictive modeling approach. *Journal of Flood Risk Management*, 14(3), 1–  
647 18. <https://doi.org/10.1111/jfr3.12739>
- 648 Warren-Myers, G., Aschwanden, G., Fuerst, F., & Krause, A. (2018). Estimating the potential  
649 risks of sea level rise for public and private property ownership, occupation and  
650 management. *Risks*, 6(2), Art. No. 37. <https://doi.org/doi:10.3390/risks6020037>

651 Witt, E., Lill, I., & Nuuter, T. (2015). Comparative analysis of current guidance for the  
652 evaluation of building retrofit investments. *Procedia Economics and Finance*, 21(2015),  
653 321–328. [https://doi.org/10.1016/S2212-5671\(15\)00183-5](https://doi.org/10.1016/S2212-5671(15)00183-5)

654 Yu, J. J., Qin, X. S. & Larsen, O. (2013). Joint Monte Carlo and possibilistic simulation for flood  
655 damage assessment. *Stochastic Environmental Research and Risk Assessment*, 27(3),  
656 725–735. <https://doi.org/10.1007/s00477-012-0635-4>  
657

658 Arcadis. (2017). *Resilient Bridgeport, Benefit Cost Analysis Methodology Report*. Retrieved  
659 from Connecticut Department of Housing [https://portal.ct.gov/-](https://portal.ct.gov/-/media/DOH/Sandy_Relief_Docs/AP-BCA.pdf?la=en)  
660 [/media/DOH/Sandy\\_Relief\\_Docs/AP-BCA.pdf?la=en](https://portal.ct.gov/-/media/DOH/Sandy_Relief_Docs/AP-BCA.pdf?la=en)

661 Arcadis. (2019). *East Side Coastal Resiliency: Benefit Cost Analysis*. Retrieved from New York  
662 City Department of Design and Construction:  
663 [https://www1.nyc.gov/assets/cdbgdr/documents/amendments/ESCR\\_BCA\\_082019.pdf](https://www1.nyc.gov/assets/cdbgdr/documents/amendments/ESCR_BCA_082019.pdf)

664 Arkin, G. (2021). Top Long Distance Moving Companies for 2021. Retrieved from  
665 <https://nexusautotransport.com/top-long-distance-moving-companies-for-2021/>. from  
666 Nexus <https://nexusautotransport.com/top-long-distance-moving-companies-for-2021/>

667 Bubeck, P., et al. (2011). How reliable are projections of future flood damage? *Natural Hazards*  
668 *and Earth System Sciences (NHESS)*, 11(12), 3293-3306.

669 Caruso, G. D. (2017). The legacy of natural disasters: The intergenerational impact of 100 years  
670 of disasters in Latin America. *Journal of Development Economics*, 127, 209-233.

671 Chaplin, J. (2019). How Long Does it Take to Find an Apartment? Retrieved from  
672 <https://www.apartmentlist.com/renter-life/how-long-to-find-an-apartment>. from  
673 Apartment List <https://www.apartmentlist.com/renter-life/how-long-to-find-an-apartment>

674 Charles, S. L. (2020). The financialization of single-family rental housing: An examination of  
675 real estate investment trusts' ownership of single-family houses in the Atlanta  
676 metropolitan area. *Journal of Urban Affairs*, 42(8), 1321-1341.

677 Das, S., & Gupta, A. (2021). Multi-criteria decision based geospatial mapping of flood  
678 susceptibility and temporal hydro-geomorphic changes in the Subarnarekha basin, India.  
679 *Geoscience Frontiers*, 12(5), 101206.

680 Federal Deposit Insurance Corporation. (2016). *Flood Insurance*. Retrieved from Federal  
681 Deposit Insurance Corporation:  
682 <https://www.fdic.gov/regulations/resources/director/technical/flood/flood-4.pdf>

683 FEMA. (2008). *2008 Supplement to the 2006 Evaluation of the National Flood Insurance*  
684 *Program's Building Standards*. Retrieved from Washington, DC:

685 FEMA. (2009). *BCA Reference Guide*. Retrieved from  
686 [https://www.fema.gov/sites/default/files/2020-04/fema\\_bca\\_reference-guide.pdf](https://www.fema.gov/sites/default/files/2020-04/fema_bca_reference-guide.pdf)

687 FEMA. (2013). *Multi-hazard Loss Estimation Methodology. Flood Model Hazus-MH Technical*  
688 *Manual*. Retrieved from Department of Homeland Security, Federal Emergency  
689 Management Agency Mitigation Division:

690 FEMA. (2016). *Benefit-Cost Sustainment And Enhancements*. . Retrieved from  
691 <https://www.caloes.ca.gov/RecoverySite/Documents/Benefit%20Cost%20Sustainment.pdf>  
692 [f](https://www.caloes.ca.gov/RecoverySite/Documents/Benefit%20Cost%20Sustainment.pdf)

693 FEMA. (2020). *Flood insurance: One small action can protect you from a huge problem*.  
694 Retrieved from Federal Emergency Management Agency:  
695 [https://agents.floodsmart.gov/sites/default/files/preferred-risk-policy-homeowners-](https://agents.floodsmart.gov/sites/default/files/preferred-risk-policy-homeowners-renters_fact-sheet_jul20.pdf)  
696 [renters\\_fact-sheet\\_jul20.pdf](https://agents.floodsmart.gov/sites/default/files/preferred-risk-policy-homeowners-renters_fact-sheet_jul20.pdf)

697 Frank, R. H. (2000). Why is cost-benefit analysis so controversial? *The Journal of Legal Studies*,  
698 29(S2), 913-930.

699 Hamideh, S., et al. (2018). Housing recovery after disasters: Primary versus seasonal/vacation  
700 housing markets in coastal communities. *Natural Hazards Review*.  
701 doi:10.1061/(ASCE)NH.1527-6996.0000287

702 Hino, M., & Hall, J. W. (2017). Real options analysis of adaptation to changing flood risk:  
703 Structural and nonstructural measures. *ASCE-ASME Journal of Risk and Uncertainty in  
704 Engineering Systems, Part A: Civil Engineering*, 3(3).

705 Hollar, M. K. (2017). Reducing the flood hazard exposure of HUD-assisted properties.  
706 *Cityscape*, 19(2), 281-300.

707 Lorente, P. (2019). A spatial analytical approach for evaluating flood risk and property damages:  
708 Methodological improvements to modelling. *Journal of Flood Risk Management*, 12(4).

709 Mangini, W., et al. (2018). Detection of trends in magnitude and frequency of flood peaks across  
710 Europe. *Hydrological Sciences Journal*, 63(4), 493-512.

711 Moselle, B. (2019). *2019 National Building Cost Manual* Craftsman Book Company. Retrieved  
712 from [https://www.craftsman-](https://www.craftsman-book.com/media/static/previews/2019_NBC_book_preview.pdf)  
713 [book.com/media/static/previews/2019\\_NBC\\_book\\_preview.pdf](https://www.craftsman-book.com/media/static/previews/2019_NBC_book_preview.pdf)

714 Moser, D. A. (1985). *Assessment of the Economic Benefits from Flood Damage Mitigation by  
715 Relocation and Evacuation*. Retrieved from

716 NFIP. (2020). *NFIP Flood Insurance Manual. Appendix F: Community Rating System*. Retrieved  
717 from Washington, DC: [https://www.fema.gov/sites/default/files/2020-05/fim\\_appendix-f-](https://www.fema.gov/sites/default/files/2020-05/fim_appendix-f-community-rating-system_apr2020.pdf)  
718 [community-rating-system\\_apr2020.pdf](https://www.fema.gov/sites/default/files/2020-05/fim_appendix-f-community-rating-system_apr2020.pdf)

719 NFIP. (2021). *NFIP Flood Insurance Manual. Appendix J: Rate Tables*. Retrieved from  
720 Washington, DC [https://www.fema.gov/sites/default/files/documents/fema\\_nfip-all-](https://www.fema.gov/sites/default/files/documents/fema_nfip-all-flood-insurance-manual-apr-2021.pdf)  
721 [flood-insurance-manual-apr-2021.pdf](https://www.fema.gov/sites/default/files/documents/fema_nfip-all-flood-insurance-manual-apr-2021.pdf)

722 Office of Management and Budget. (1992). *Guidelines and Discount Rates for Benefit-cost  
723 Analysis of Federal Programs. Circular No. A-94*. Retrieved from  
724 <https://www.whitehouse.gov/sites/whitehouse.gov/files/omb/circulars/A94/a094.pdf>

725 Rosen, K. T. (2018). *The Case for Preserving Costa-Hawkins-The Potential Impacts of Rent  
726 Control on Single Family Homes*. Retrieved from  
727 <https://escholarship.org/content/qt8wt9p088/qt8wt9p088.pdf>

728 Rosser, J. F., et al. (2017). Rapid flood inundation mapping using social media, remote sensing  
729 and topographic data. *Natural Hazards. . Nat. Haz.*, 1(87).

730 Tate, E., et al. (2016). Flood recovery and property acquisition in Cedar Rapids, Iowa. *Natural  
731 hazards*, 80(3), 2055-2079.

732 Termeh, S. V. R., et al. (2018). Flood susceptibility mapping using novel ensembles of adaptive  
733 neuro fuzzy inference system and metaheuristic algorithms. *Science of the Total  
734 Environment*, 615, 438-451.

735 U.S. General Service Administration (2021). Per Diem Rates. Retrieved from  
736 [https://www.gsa.gov/cdnstatic/FY2021\\_PerDiemMasterRatesFile.xls](https://www.gsa.gov/cdnstatic/FY2021_PerDiemMasterRatesFile.xls). from U.S. General  
737 Service Administration  
738 [https://www.gsa.gov/cdnstatic/FY2021\\_PerDiemMasterRatesFile.xls](https://www.gsa.gov/cdnstatic/FY2021_PerDiemMasterRatesFile.xls)

739 USACE. (2000). Economic Guidance Memorandum (EGM) 01-03, Generic Depth Damage  
740 Relationships. 1–3. In: Memorandum from USACE (United States Army Corps of  
741 Engineers), Washington, DC.

742 Warren-Myers, G., et al. (2018). Estimating the potential risks of sea level rise for public and  
743 private property ownership, occupation and management. *Risks*, 6(2).  
744 doi:10.3390/risks6020037  
745 Zadeh, S. M., et al. (2020). Detection of trends in flood magnitude and frequency in Canada.  
746 *Journal of Hydrology: Regional Studies*, 28, 100673.  
747
